# Supplementary material for: Establishment of a Prediction Model for Overall Survival after Stereotactic Body Radiation Therapy for Primary Non-Small Cell Lung Cancer Using Radiomics Analysis
Source: MDPI journal article supplement (doi:10.3390/cancers14163859), 2022-08-10
Supplement: s1 [file s1]

**Table S1.** List of all 107 radiomic features.

| Category                        | Radiomic feature            |
|---------------------------------|-----------------------------|
| First order                     | 10Percentile                |
|                                 | 90Percentile                |
|                                 | Energy                      |
|                                 | Entropy                     |
|                                 | InterquartileRange          |
|                                 | Kurtosis                    |
|                                 | Maximum                     |
|                                 | MeanAbsoluteDeviation       |
|                                 | Mean                        |
|                                 | Median                      |
|                                 | Minimum                     |
|                                 | Range                       |
|                                 | RobustMeanAbsoluteDeviation |
|                                 | RootMeanSquared             |
|                                 | Skewness                    |
|                                 | TotalEnergy                 |
|                                 | Uniformity                  |
|                                 | Variance                    |
|                                 | Elongation                  |
|                                 | Flatness                    |
| Shape                           | LeastAxisLength             |
|                                 | MajorAxisLength             |
|                                 | Maximum2DDiameterColumn     |
|                                 | Maximum2DDiameterRow        |
|                                 | Maximum2DDiameterSlice      |
|                                 | Maximum3DDiameter           |
|                                 | MeshVolume                  |
|                                 | MinorAxisLength             |
|                                 | Sphericity                  |
|                                 | SurfaceArea                 |
|                                 | SurfaceVolumeRatio          |
|                                 | VoxelVolume                 |
|                                 | Autocorrelation             |
|                                 | ClusterProminence           |
|                                 | ClusterShade                |
| Gray-level co-occurrence matrix | ClusterTendency             |
|                                 | Contrast                    |
|                                 | Correlation                 |
|                                 | DifferenceAverage           |
|                                 | DifferenceEntropy           |

|                              |                                  |
|------------------------------|----------------------------------|
|                              | DifferenceVariance               |
|                              | Id                               |
|                              | Idm                              |
|                              | Idmn                             |
|                              | Idn                              |
|                              | Imc1                             |
|                              | Imc2                             |
|                              | InverseVariance                  |
|                              | JointAverage                     |
|                              | JointEnergy                      |
|                              | JointEntropy                     |
|                              | MCC                              |
|                              | MaximumProbability               |
|                              | SumAverage                       |
|                              | SumEntropy                       |
|                              | SumSquares                       |
|                              | GrayLevelNonUniformity           |
|                              | GrayLevelNonUniformityNormalized |
|                              | GrayLevelVariance                |
|                              | HighGrayLevelZoneEmphasis        |
|                              | LargeAreaEmphasis                |
|                              | LargeAreaHighGrayLevelEmphasis   |
|                              | LargeAreaLowGrayLevelEmphasis    |
| Gray-level size-zone matrix  | LowGrayLevelZoneEmphasis         |
|                              | SizeZoneNonUniformity            |
|                              | SizeZoneNonUniformityNormalized  |
|                              | SmallAreaEmphasis                |
|                              | SmallAreaHighGrayLevelEmphasis   |
|                              | SmallAreaLowGrayLevelEmphasis    |
|                              | ZoneEntropy                      |
|                              | ZonePercentage                   |
|                              | ZoneVariance                     |
|                              | GrayLevelNonUniformity           |
|                              | GrayLevelNonUniformityNormalized |
|                              | GrayLevelVariance                |
|                              | HighGrayLevelRunEmphasis         |
|                              | LongRunEmphasis                  |
| Gray-level run-length matrix | LongRunHighGrayLevelEmphasis     |
|                              | LongRunLowGrayLevelEmphasis      |
|                              | LowGrayLevelRunEmphasis          |
|                              | RunEntropy                       |
|                              | RunLengthNonUniformity           |
|                              | RunLengthNonUniformityNormalized |

|                                         |                                      |
|-----------------------------------------|--------------------------------------|
| Neighboring gray-tone difference matrix | RunPercentage                        |
|                                         | RunVariance                          |
|                                         | ShortRunEmphasis                     |
|                                         | ShortRunHighGrayLevelEmphasis        |
|                                         | ShortRunLowGrayLevelEmphasis         |
|                                         | Busyness                             |
|                                         | Coarseness                           |
|                                         | Complexity                           |
|                                         | Contrast                             |
|                                         | Strength                             |
|                                         | DependenceEntropy                    |
|                                         | DependenceNonUniformity              |
|                                         | DependenceNonUniformityNormalized    |
|                                         | DependenceVariance                   |
| Gray-level dependence matrix            | GrayLevelNonUniformity               |
|                                         | GrayLevelVariance                    |
|                                         | HighGrayLevelEmphasis                |
|                                         | LargeDependenceEmphasis              |
|                                         | LargeDependenceHighGrayLevelEmphasis |
|                                         | LargeDependenceLowGrayLevelEmphasis  |
|                                         | LowGrayLevelEmphasis                 |
|                                         | SmallDependenceEmphasis              |
|                                         | SmallDependenceHighGrayLevelEmphasis |
|                                         | SmallDependenceLowGrayLevelEmphasis  |
